# Supplementary material for: Diagnosis of lupus mastitis via multimodal ultrasound: case description
Source: PubMed Central journal article supplement — Quant Imaging Med Surg. 2024 Mar 15;14(4):3235–8. doi: 10.21037/qims-23-1279 (PMC11007494; doi:10.21037/qims-23-1279), 2024-03-15
Supplement: qims-14-04-3235-coif.pdf [file qims-14-04-3235-coif.pdf]

## ICMJE DISCLOSURE FORM

**Date:** 1/2/2024

**Your Name:** Yanzhao Wang

**Manuscript Title:** Diagnosis of lupus mastitis by multimodal ultrasound: A case description.

**Manuscript Number (if known):** QIMS-23-1279

In the interest of transparency, we ask you to disclose all relationships/activities/interests listed below that are related to the content of your manuscript. "Related" means any relation with for-profit or not-for-profit third parties whose interests may be affected by the content of the manuscript. Disclosure represents a commitment to transparency and does not necessarily indicate a bias. If you are in doubt about whether to list a relationship/activity/interest, it is preferable that you do so.

The author's relationships/activities/interests should be defined broadly. For example, if your manuscript pertains to the epidemiology of hypertension, you should declare all relationships with manufacturers of antihypertensive medication, even if that medication is not mentioned in the manuscript.

In item #1 below, report all support for the work reported in this manuscript without time limit. For all other items, the time frame for disclosure is the past 36 months.

| <b>Time frame: Since the initial planning of the work</b> |                                                                                                                                                                                |                                                 |                                                                                                                                                                                                                                                                                                                                                                        |  |  |  |  |  |  |
|-----------------------------------------------------------|--------------------------------------------------------------------------------------------------------------------------------------------------------------------------------|-------------------------------------------------|------------------------------------------------------------------------------------------------------------------------------------------------------------------------------------------------------------------------------------------------------------------------------------------------------------------------------------------------------------------------|--|--|--|--|--|--|
| <b>1</b>                                                  | All support for the present manuscript (e.g., funding, provision of study materials, medical writing, article processing charges, etc.)<br><b>No time limit for this item.</b> | <input checked="" type="checkbox"/> <b>None</b> | <table border="1" style="width: 100%; border-collapse: collapse;"> <tr><td style="height: 20px;"> </td><td style="width: 50%;"> </td></tr> <tr><td style="height: 20px;"> </td><td> </td></tr> <tr><td style="height: 20px;"> </td><td> </td></tr> </table> <p style="font-size: small; text-align: right; color: gray;">Click the tab key to add additional rows.</p> |  |  |  |  |  |  |
|                                                           |                                                                                                                                                                                |                                                 |                                                                                                                                                                                                                                                                                                                                                                        |  |  |  |  |  |  |
|                                                           |                                                                                                                                                                                |                                                 |                                                                                                                                                                                                                                                                                                                                                                        |  |  |  |  |  |  |
|                                                           |                                                                                                                                                                                |                                                 |                                                                                                                                                                                                                                                                                                                                                                        |  |  |  |  |  |  |
| <b>Time frame: past 36 months</b>                         |                                                                                                                                                                                |                                                 |                                                                                                                                                                                                                                                                                                                                                                        |  |  |  |  |  |  |
| <b>2</b>                                                  | Grants or contracts from any entity (if not indicated in item #1 above).                                                                                                       | <input checked="" type="checkbox"/> <b>None</b> | <table border="1" style="width: 100%; border-collapse: collapse;"> <tr><td style="height: 20px;"> </td><td style="width: 50%;"> </td></tr> <tr><td style="height: 20px;"> </td><td> </td></tr> <tr><td style="height: 20px;"> </td><td> </td></tr> </table>                                                                                                            |  |  |  |  |  |  |
|                                                           |                                                                                                                                                                                |                                                 |                                                                                                                                                                                                                                                                                                                                                                        |  |  |  |  |  |  |
|                                                           |                                                                                                                                                                                |                                                 |                                                                                                                                                                                                                                                                                                                                                                        |  |  |  |  |  |  |
|                                                           |                                                                                                                                                                                |                                                 |                                                                                                                                                                                                                                                                                                                                                                        |  |  |  |  |  |  |
| <b>3</b>                                                  | Royalties or licenses                                                                                                                                                          | <input checked="" type="checkbox"/> <b>None</b> | <table border="1" style="width: 100%; border-collapse: collapse;"> <tr><td style="height: 20px;"> </td><td style="width: 50%;"> </td></tr> <tr><td style="height: 20px;"> </td><td> </td></tr> <tr><td style="height: 20px;"> </td><td> </td></tr> </table>                                                                                                            |  |  |  |  |  |  |
|                                                           |                                                                                                                                                                                |                                                 |                                                                                                                                                                                                                                                                                                                                                                        |  |  |  |  |  |  |
|                                                           |                                                                                                                                                                                |                                                 |                                                                                                                                                                                                                                                                                                                                                                        |  |  |  |  |  |  |
|                                                           |                                                                                                                                                                                |                                                 |                                                                                                                                                                                                                                                                                                                                                                        |  |  |  |  |  |  |

|                    |                                                                                                              |                                                                                                                                                                                                                      |  |                    |  |  |  |  |  |  |  |
|--------------------|--------------------------------------------------------------------------------------------------------------|----------------------------------------------------------------------------------------------------------------------------------------------------------------------------------------------------------------------|--|--------------------|--|--|--|--|--|--|--|
|                    |                                                                                                              |                                                                                                                                                                                                                      |  |                    |  |  |  |  |  |  |  |
| 4                  | Consulting fees                                                                                              | <input checked="" type="checkbox"/> None<br><table border="1" data-bbox="383 226 1516 365"> <tr><td></td><td></td></tr> <tr><td></td><td></td></tr> <tr><td></td><td></td></tr> <tr><td></td><td></td></tr> </table> |  |                    |  |  |  |  |  |  |  |
|                    |                                                                                                              |                                                                                                                                                                                                                      |  |                    |  |  |  |  |  |  |  |
|                    |                                                                                                              |                                                                                                                                                                                                                      |  |                    |  |  |  |  |  |  |  |
|                    |                                                                                                              |                                                                                                                                                                                                                      |  |                    |  |  |  |  |  |  |  |
|                    |                                                                                                              |                                                                                                                                                                                                                      |  |                    |  |  |  |  |  |  |  |
| 5                  | Payment or honoraria for lectures, presentations, speakers bureaus, manuscript writing or educational events | <input type="checkbox"/> None<br><table border="1" data-bbox="383 451 1516 552"> <tr><td>manuscript writing</td><td></td></tr> <tr><td></td><td></td></tr> <tr><td></td><td></td></tr> </table>                      |  | manuscript writing |  |  |  |  |  |  |  |
| manuscript writing |                                                                                                              |                                                                                                                                                                                                                      |  |                    |  |  |  |  |  |  |  |
|                    |                                                                                                              |                                                                                                                                                                                                                      |  |                    |  |  |  |  |  |  |  |
|                    |                                                                                                              |                                                                                                                                                                                                                      |  |                    |  |  |  |  |  |  |  |
| 6                  | Payment for expert testimony                                                                                 | <input checked="" type="checkbox"/> None<br><table border="1" data-bbox="383 793 1516 894"> <tr><td></td><td></td></tr> <tr><td></td><td></td></tr> <tr><td></td><td></td></tr> </table>                             |  |                    |  |  |  |  |  |  |  |
|                    |                                                                                                              |                                                                                                                                                                                                                      |  |                    |  |  |  |  |  |  |  |
|                    |                                                                                                              |                                                                                                                                                                                                                      |  |                    |  |  |  |  |  |  |  |
|                    |                                                                                                              |                                                                                                                                                                                                                      |  |                    |  |  |  |  |  |  |  |
| 7                  | Support for attending meetings and/or travel                                                                 | <input checked="" type="checkbox"/> None<br><table border="1" data-bbox="383 1012 1516 1113"> <tr><td></td><td></td></tr> <tr><td></td><td></td></tr> <tr><td></td><td></td></tr> </table>                           |  |                    |  |  |  |  |  |  |  |
|                    |                                                                                                              |                                                                                                                                                                                                                      |  |                    |  |  |  |  |  |  |  |
|                    |                                                                                                              |                                                                                                                                                                                                                      |  |                    |  |  |  |  |  |  |  |
|                    |                                                                                                              |                                                                                                                                                                                                                      |  |                    |  |  |  |  |  |  |  |
| 8                  | Patents planned, issued or pending                                                                           | <input checked="" type="checkbox"/> None<br><table border="1" data-bbox="383 1230 1516 1331"> <tr><td></td><td></td></tr> <tr><td></td><td></td></tr> <tr><td></td><td></td></tr> </table>                           |  |                    |  |  |  |  |  |  |  |
|                    |                                                                                                              |                                                                                                                                                                                                                      |  |                    |  |  |  |  |  |  |  |
|                    |                                                                                                              |                                                                                                                                                                                                                      |  |                    |  |  |  |  |  |  |  |
|                    |                                                                                                              |                                                                                                                                                                                                                      |  |                    |  |  |  |  |  |  |  |
| 9                  | Participation on a Data Safety Monitoring Board or Advisory Board                                            | <input checked="" type="checkbox"/> None<br><table border="1" data-bbox="383 1449 1516 1549"> <tr><td></td><td></td></tr> <tr><td></td><td></td></tr> <tr><td></td><td></td></tr> </table>                           |  |                    |  |  |  |  |  |  |  |
|                    |                                                                                                              |                                                                                                                                                                                                                      |  |                    |  |  |  |  |  |  |  |
|                    |                                                                                                              |                                                                                                                                                                                                                      |  |                    |  |  |  |  |  |  |  |
|                    |                                                                                                              |                                                                                                                                                                                                                      |  |                    |  |  |  |  |  |  |  |
| 10                 | Leadership or fiduciary role in other board, society, committee or advocacy group, paid or unpaid            | <input checked="" type="checkbox"/> None<br><table border="1" data-bbox="383 1633 1516 1734"> <tr><td></td><td></td></tr> <tr><td></td><td></td></tr> <tr><td></td><td></td></tr> </table>                           |  |                    |  |  |  |  |  |  |  |
|                    |                                                                                                              |                                                                                                                                                                                                                      |  |                    |  |  |  |  |  |  |  |
|                    |                                                                                                              |                                                                                                                                                                                                                      |  |                    |  |  |  |  |  |  |  |
|                    |                                                                                                              |                                                                                                                                                                                                                      |  |                    |  |  |  |  |  |  |  |

|           |                                                                                  |                                                                                                                                                                                                 |  |  |  |  |  |  |  |
|-----------|----------------------------------------------------------------------------------|-------------------------------------------------------------------------------------------------------------------------------------------------------------------------------------------------|--|--|--|--|--|--|--|
|           |                                                                                  |                                                                                                                                                                                                 |  |  |  |  |  |  |  |
| <b>11</b> | Stock or stock options                                                           | <input checked="" type="checkbox"/> <b>None</b><br><table border="1" data-bbox="383 226 1516 331"> <tr><td></td><td></td></tr> <tr><td></td><td></td></tr> <tr><td></td><td></td></tr> </table> |  |  |  |  |  |  |  |
|           |                                                                                  |                                                                                                                                                                                                 |  |  |  |  |  |  |  |
|           |                                                                                  |                                                                                                                                                                                                 |  |  |  |  |  |  |  |
|           |                                                                                  |                                                                                                                                                                                                 |  |  |  |  |  |  |  |
| <b>12</b> | Receipt of equipment, materials, drugs, medical writing, gifts or other services | <input type="checkbox"/> <b>None</b><br><table border="1" data-bbox="383 447 1516 552"> <tr><td></td><td></td></tr> <tr><td></td><td></td></tr> <tr><td></td><td></td></tr> </table>            |  |  |  |  |  |  |  |
|           |                                                                                  |                                                                                                                                                                                                 |  |  |  |  |  |  |  |
|           |                                                                                  |                                                                                                                                                                                                 |  |  |  |  |  |  |  |
|           |                                                                                  |                                                                                                                                                                                                 |  |  |  |  |  |  |  |
| <b>13</b> | Other financial or non-financial interests                                       | <input checked="" type="checkbox"/> <b>None</b><br><table border="1" data-bbox="383 661 1516 766"> <tr><td></td><td></td></tr> <tr><td></td><td></td></tr> <tr><td></td><td></td></tr> </table> |  |  |  |  |  |  |  |
|           |                                                                                  |                                                                                                                                                                                                 |  |  |  |  |  |  |  |
|           |                                                                                  |                                                                                                                                                                                                 |  |  |  |  |  |  |  |
|           |                                                                                  |                                                                                                                                                                                                 |  |  |  |  |  |  |  |

**Please place an "X" next to the following statement to indicate your agreement:**

I certify that I have answered every question and have not altered the wording of any of the questions on this form.

## ICMJE DISCLOSURE FORM

**Date:** 1/2/2024

**Your Name:** Zhiyu Feng

**Manuscript Title:** Diagnosis of lupus mastitis by multimodal ultrasound: A case description.

**Manuscript Number (if known):** QIMS-23-1279

In the interest of transparency, we ask you to disclose all relationships/activities/interests listed below that are related to the content of your manuscript. "Related" means any relation with for-profit or not-for-profit third parties whose interests may be affected by the content of the manuscript. Disclosure represents a commitment to transparency and does not necessarily indicate a bias. If you are in doubt about whether to list a relationship/activity/interest, it is preferable that you do so.

The author's relationships/activities/interests should be defined broadly. For example, if your manuscript pertains to the epidemiology of hypertension, you should declare all relationships with manufacturers of antihypertensive medication, even if that medication is not mentioned in the manuscript.

In item #1 below, report all support for the work reported in this manuscript without time limit. For all other items, the time frame for disclosure is the past 36 months.

| <b>Time frame: Since the initial planning of the work</b> |                                                                                                                                                                                |                                                 |                                                                                                                                                                                                                                                                                                                                                                            |  |  |  |  |  |  |
|-----------------------------------------------------------|--------------------------------------------------------------------------------------------------------------------------------------------------------------------------------|-------------------------------------------------|----------------------------------------------------------------------------------------------------------------------------------------------------------------------------------------------------------------------------------------------------------------------------------------------------------------------------------------------------------------------------|--|--|--|--|--|--|
| <b>1</b>                                                  | All support for the present manuscript (e.g., funding, provision of study materials, medical writing, article processing charges, etc.)<br><b>No time limit for this item.</b> | <input checked="" type="checkbox"/> <b>None</b> | <table border="1" style="width: 100%; border-collapse: collapse;"> <tr><td style="height: 20px;"> </td><td style="width: 50%;"> </td></tr> <tr><td style="height: 20px;"> </td><td> </td></tr> <tr><td style="height: 20px;"> </td><td> </td></tr> </table> <p style="font-size: small; text-align: right; margin-top: 5px;">Click the tab key to add additional rows.</p> |  |  |  |  |  |  |
|                                                           |                                                                                                                                                                                |                                                 |                                                                                                                                                                                                                                                                                                                                                                            |  |  |  |  |  |  |
|                                                           |                                                                                                                                                                                |                                                 |                                                                                                                                                                                                                                                                                                                                                                            |  |  |  |  |  |  |
|                                                           |                                                                                                                                                                                |                                                 |                                                                                                                                                                                                                                                                                                                                                                            |  |  |  |  |  |  |
| <b>Time frame: past 36 months</b>                         |                                                                                                                                                                                |                                                 |                                                                                                                                                                                                                                                                                                                                                                            |  |  |  |  |  |  |
| <b>2</b>                                                  | Grants or contracts from any entity (if not indicated in item #1 above).                                                                                                       | <input checked="" type="checkbox"/> <b>None</b> | <table border="1" style="width: 100%; border-collapse: collapse;"> <tr><td style="height: 20px;"> </td><td style="width: 50%;"> </td></tr> <tr><td style="height: 20px;"> </td><td> </td></tr> <tr><td style="height: 20px;"> </td><td> </td></tr> </table>                                                                                                                |  |  |  |  |  |  |
|                                                           |                                                                                                                                                                                |                                                 |                                                                                                                                                                                                                                                                                                                                                                            |  |  |  |  |  |  |
|                                                           |                                                                                                                                                                                |                                                 |                                                                                                                                                                                                                                                                                                                                                                            |  |  |  |  |  |  |
|                                                           |                                                                                                                                                                                |                                                 |                                                                                                                                                                                                                                                                                                                                                                            |  |  |  |  |  |  |
| <b>3</b>                                                  | Royalties or licenses                                                                                                                                                          | <input checked="" type="checkbox"/> <b>None</b> | <table border="1" style="width: 100%; border-collapse: collapse;"> <tr><td style="height: 20px;"> </td><td style="width: 50%;"> </td></tr> <tr><td style="height: 20px;"> </td><td> </td></tr> <tr><td style="height: 20px;"> </td><td> </td></tr> </table>                                                                                                                |  |  |  |  |  |  |
|                                                           |                                                                                                                                                                                |                                                 |                                                                                                                                                                                                                                                                                                                                                                            |  |  |  |  |  |  |
|                                                           |                                                                                                                                                                                |                                                 |                                                                                                                                                                                                                                                                                                                                                                            |  |  |  |  |  |  |
|                                                           |                                                                                                                                                                                |                                                 |                                                                                                                                                                                                                                                                                                                                                                            |  |  |  |  |  |  |

|                    |                                                                                                              |                                                                                                                                                                                                                      |  |                    |  |  |  |  |  |  |  |
|--------------------|--------------------------------------------------------------------------------------------------------------|----------------------------------------------------------------------------------------------------------------------------------------------------------------------------------------------------------------------|--|--------------------|--|--|--|--|--|--|--|
|                    |                                                                                                              |                                                                                                                                                                                                                      |  |                    |  |  |  |  |  |  |  |
| 4                  | Consulting fees                                                                                              | <input checked="" type="checkbox"/> None<br><table border="1" data-bbox="383 226 1516 365"> <tr><td></td><td></td></tr> <tr><td></td><td></td></tr> <tr><td></td><td></td></tr> <tr><td></td><td></td></tr> </table> |  |                    |  |  |  |  |  |  |  |
|                    |                                                                                                              |                                                                                                                                                                                                                      |  |                    |  |  |  |  |  |  |  |
|                    |                                                                                                              |                                                                                                                                                                                                                      |  |                    |  |  |  |  |  |  |  |
|                    |                                                                                                              |                                                                                                                                                                                                                      |  |                    |  |  |  |  |  |  |  |
|                    |                                                                                                              |                                                                                                                                                                                                                      |  |                    |  |  |  |  |  |  |  |
| 5                  | Payment or honoraria for lectures, presentations, speakers bureaus, manuscript writing or educational events | <input type="checkbox"/> None<br><table border="1" data-bbox="383 451 1516 552"> <tr><td>manuscript writing</td><td></td></tr> <tr><td></td><td></td></tr> <tr><td></td><td></td></tr> </table>                      |  | manuscript writing |  |  |  |  |  |  |  |
| manuscript writing |                                                                                                              |                                                                                                                                                                                                                      |  |                    |  |  |  |  |  |  |  |
|                    |                                                                                                              |                                                                                                                                                                                                                      |  |                    |  |  |  |  |  |  |  |
|                    |                                                                                                              |                                                                                                                                                                                                                      |  |                    |  |  |  |  |  |  |  |
| 6                  | Payment for expert testimony                                                                                 | <input checked="" type="checkbox"/> None<br><table border="1" data-bbox="383 793 1516 894"> <tr><td></td><td></td></tr> <tr><td></td><td></td></tr> <tr><td></td><td></td></tr> </table>                             |  |                    |  |  |  |  |  |  |  |
|                    |                                                                                                              |                                                                                                                                                                                                                      |  |                    |  |  |  |  |  |  |  |
|                    |                                                                                                              |                                                                                                                                                                                                                      |  |                    |  |  |  |  |  |  |  |
|                    |                                                                                                              |                                                                                                                                                                                                                      |  |                    |  |  |  |  |  |  |  |
| 7                  | Support for attending meetings and/or travel                                                                 | <input checked="" type="checkbox"/> None<br><table border="1" data-bbox="383 1012 1516 1113"> <tr><td></td><td></td></tr> <tr><td></td><td></td></tr> <tr><td></td><td></td></tr> </table>                           |  |                    |  |  |  |  |  |  |  |
|                    |                                                                                                              |                                                                                                                                                                                                                      |  |                    |  |  |  |  |  |  |  |
|                    |                                                                                                              |                                                                                                                                                                                                                      |  |                    |  |  |  |  |  |  |  |
|                    |                                                                                                              |                                                                                                                                                                                                                      |  |                    |  |  |  |  |  |  |  |
| 8                  | Patents planned, issued or pending                                                                           | <input checked="" type="checkbox"/> None<br><table border="1" data-bbox="383 1230 1516 1331"> <tr><td></td><td></td></tr> <tr><td></td><td></td></tr> <tr><td></td><td></td></tr> </table>                           |  |                    |  |  |  |  |  |  |  |
|                    |                                                                                                              |                                                                                                                                                                                                                      |  |                    |  |  |  |  |  |  |  |
|                    |                                                                                                              |                                                                                                                                                                                                                      |  |                    |  |  |  |  |  |  |  |
|                    |                                                                                                              |                                                                                                                                                                                                                      |  |                    |  |  |  |  |  |  |  |
| 9                  | Participation on a Data Safety Monitoring Board or Advisory Board                                            | <input checked="" type="checkbox"/> None<br><table border="1" data-bbox="383 1449 1516 1549"> <tr><td></td><td></td></tr> <tr><td></td><td></td></tr> <tr><td></td><td></td></tr> </table>                           |  |                    |  |  |  |  |  |  |  |
|                    |                                                                                                              |                                                                                                                                                                                                                      |  |                    |  |  |  |  |  |  |  |
|                    |                                                                                                              |                                                                                                                                                                                                                      |  |                    |  |  |  |  |  |  |  |
|                    |                                                                                                              |                                                                                                                                                                                                                      |  |                    |  |  |  |  |  |  |  |
| 10                 | Leadership or fiduciary role in other board, society, committee or advocacy group, paid or unpaid            | <input checked="" type="checkbox"/> None<br><table border="1" data-bbox="383 1633 1516 1734"> <tr><td></td><td></td></tr> <tr><td></td><td></td></tr> <tr><td></td><td></td></tr> </table>                           |  |                    |  |  |  |  |  |  |  |
|                    |                                                                                                              |                                                                                                                                                                                                                      |  |                    |  |  |  |  |  |  |  |
|                    |                                                                                                              |                                                                                                                                                                                                                      |  |                    |  |  |  |  |  |  |  |
|                    |                                                                                                              |                                                                                                                                                                                                                      |  |                    |  |  |  |  |  |  |  |

|           |                                                                                  |                                                                                                                                                                                                 |  |  |  |  |  |  |  |
|-----------|----------------------------------------------------------------------------------|-------------------------------------------------------------------------------------------------------------------------------------------------------------------------------------------------|--|--|--|--|--|--|--|
|           |                                                                                  |                                                                                                                                                                                                 |  |  |  |  |  |  |  |
| <b>11</b> | Stock or stock options                                                           | <input checked="" type="checkbox"/> <b>None</b><br><table border="1" data-bbox="383 228 1516 331"> <tr><td></td><td></td></tr> <tr><td></td><td></td></tr> <tr><td></td><td></td></tr> </table> |  |  |  |  |  |  |  |
|           |                                                                                  |                                                                                                                                                                                                 |  |  |  |  |  |  |  |
|           |                                                                                  |                                                                                                                                                                                                 |  |  |  |  |  |  |  |
|           |                                                                                  |                                                                                                                                                                                                 |  |  |  |  |  |  |  |
| <b>12</b> | Receipt of equipment, materials, drugs, medical writing, gifts or other services | <input type="checkbox"/> <b>None</b><br><table border="1" data-bbox="383 449 1516 552"> <tr><td></td><td></td></tr> <tr><td></td><td></td></tr> <tr><td></td><td></td></tr> </table>            |  |  |  |  |  |  |  |
|           |                                                                                  |                                                                                                                                                                                                 |  |  |  |  |  |  |  |
|           |                                                                                  |                                                                                                                                                                                                 |  |  |  |  |  |  |  |
|           |                                                                                  |                                                                                                                                                                                                 |  |  |  |  |  |  |  |
| <b>13</b> | Other financial or non-financial interests                                       | <input checked="" type="checkbox"/> <b>None</b><br><table border="1" data-bbox="383 663 1516 766"> <tr><td></td><td></td></tr> <tr><td></td><td></td></tr> <tr><td></td><td></td></tr> </table> |  |  |  |  |  |  |  |
|           |                                                                                  |                                                                                                                                                                                                 |  |  |  |  |  |  |  |
|           |                                                                                  |                                                                                                                                                                                                 |  |  |  |  |  |  |  |
|           |                                                                                  |                                                                                                                                                                                                 |  |  |  |  |  |  |  |

**Please place an "X" next to the following statement to indicate your agreement:**

I certify that I have answered every question and have not altered the wording of any of the questions on this form.

## ICMJE DISCLOSURE FORM

**Date:** 1/2/2024

**Your Name:** Bin Ma

**Manuscript Title:** Diagnosis of lupus mastitis by multimodal ultrasound: A case description.

**Manuscript Number (if known):** QIMS-23-1279

In the interest of transparency, we ask you to disclose all relationships/activities/interests listed below that are related to the content of your manuscript. "Related" means any relation with for-profit or not-for-profit third parties whose interests may be affected by the content of the manuscript. Disclosure represents a commitment to transparency and does not necessarily indicate a bias. If you are in doubt about whether to list a relationship/activity/interest, it is preferable that you do so.

The author's relationships/activities/interests should be defined broadly. For example, if your manuscript pertains to the epidemiology of hypertension, you should declare all relationships with manufacturers of antihypertensive medication, even if that medication is not mentioned in the manuscript.

In item #1 below, report all support for the work reported in this manuscript without time limit. For all other items, the time frame for disclosure is the past 36 months.

| <b>Time frame: Since the initial planning of the work</b> |                                                                                                                                                                                |                                                 |                                                                                                                                                                                                                                                                                                                                                                        |  |  |  |  |  |  |
|-----------------------------------------------------------|--------------------------------------------------------------------------------------------------------------------------------------------------------------------------------|-------------------------------------------------|------------------------------------------------------------------------------------------------------------------------------------------------------------------------------------------------------------------------------------------------------------------------------------------------------------------------------------------------------------------------|--|--|--|--|--|--|
| <b>1</b>                                                  | All support for the present manuscript (e.g., funding, provision of study materials, medical writing, article processing charges, etc.)<br><b>No time limit for this item.</b> | <input checked="" type="checkbox"/> <b>None</b> | <table border="1" style="width: 100%; border-collapse: collapse;"> <tr><td style="height: 20px;"> </td><td style="width: 50%;"> </td></tr> <tr><td style="height: 20px;"> </td><td> </td></tr> <tr><td style="height: 20px;"> </td><td> </td></tr> </table> <p style="font-size: small; text-align: right; color: gray;">Click the tab key to add additional rows.</p> |  |  |  |  |  |  |
|                                                           |                                                                                                                                                                                |                                                 |                                                                                                                                                                                                                                                                                                                                                                        |  |  |  |  |  |  |
|                                                           |                                                                                                                                                                                |                                                 |                                                                                                                                                                                                                                                                                                                                                                        |  |  |  |  |  |  |
|                                                           |                                                                                                                                                                                |                                                 |                                                                                                                                                                                                                                                                                                                                                                        |  |  |  |  |  |  |
| <b>Time frame: past 36 months</b>                         |                                                                                                                                                                                |                                                 |                                                                                                                                                                                                                                                                                                                                                                        |  |  |  |  |  |  |
| <b>2</b>                                                  | Grants or contracts from any entity (if not indicated in item #1 above).                                                                                                       | <input checked="" type="checkbox"/> <b>None</b> | <table border="1" style="width: 100%; border-collapse: collapse;"> <tr><td style="height: 20px;"> </td><td style="width: 50%;"> </td></tr> <tr><td style="height: 20px;"> </td><td> </td></tr> <tr><td style="height: 20px;"> </td><td> </td></tr> </table>                                                                                                            |  |  |  |  |  |  |
|                                                           |                                                                                                                                                                                |                                                 |                                                                                                                                                                                                                                                                                                                                                                        |  |  |  |  |  |  |
|                                                           |                                                                                                                                                                                |                                                 |                                                                                                                                                                                                                                                                                                                                                                        |  |  |  |  |  |  |
|                                                           |                                                                                                                                                                                |                                                 |                                                                                                                                                                                                                                                                                                                                                                        |  |  |  |  |  |  |
| <b>3</b>                                                  | Royalties or licenses                                                                                                                                                          | <input checked="" type="checkbox"/> <b>None</b> | <table border="1" style="width: 100%; border-collapse: collapse;"> <tr><td style="height: 20px;"> </td><td style="width: 50%;"> </td></tr> <tr><td style="height: 20px;"> </td><td> </td></tr> <tr><td style="height: 20px;"> </td><td> </td></tr> </table>                                                                                                            |  |  |  |  |  |  |
|                                                           |                                                                                                                                                                                |                                                 |                                                                                                                                                                                                                                                                                                                                                                        |  |  |  |  |  |  |
|                                                           |                                                                                                                                                                                |                                                 |                                                                                                                                                                                                                                                                                                                                                                        |  |  |  |  |  |  |
|                                                           |                                                                                                                                                                                |                                                 |                                                                                                                                                                                                                                                                                                                                                                        |  |  |  |  |  |  |

|                    |                                                                                                              |                                                                                                                                                                                                                      |  |                    |  |  |  |  |  |  |  |
|--------------------|--------------------------------------------------------------------------------------------------------------|----------------------------------------------------------------------------------------------------------------------------------------------------------------------------------------------------------------------|--|--------------------|--|--|--|--|--|--|--|
|                    |                                                                                                              |                                                                                                                                                                                                                      |  |                    |  |  |  |  |  |  |  |
| 4                  | Consulting fees                                                                                              | <input checked="" type="checkbox"/> None<br><table border="1" data-bbox="383 226 1516 365"> <tr><td></td><td></td></tr> <tr><td></td><td></td></tr> <tr><td></td><td></td></tr> <tr><td></td><td></td></tr> </table> |  |                    |  |  |  |  |  |  |  |
|                    |                                                                                                              |                                                                                                                                                                                                                      |  |                    |  |  |  |  |  |  |  |
|                    |                                                                                                              |                                                                                                                                                                                                                      |  |                    |  |  |  |  |  |  |  |
|                    |                                                                                                              |                                                                                                                                                                                                                      |  |                    |  |  |  |  |  |  |  |
|                    |                                                                                                              |                                                                                                                                                                                                                      |  |                    |  |  |  |  |  |  |  |
| 5                  | Payment or honoraria for lectures, presentations, speakers bureaus, manuscript writing or educational events | <input type="checkbox"/> None<br><table border="1" data-bbox="383 451 1516 552"> <tr><td>manuscript writing</td><td></td></tr> <tr><td></td><td></td></tr> <tr><td></td><td></td></tr> </table>                      |  | manuscript writing |  |  |  |  |  |  |  |
| manuscript writing |                                                                                                              |                                                                                                                                                                                                                      |  |                    |  |  |  |  |  |  |  |
|                    |                                                                                                              |                                                                                                                                                                                                                      |  |                    |  |  |  |  |  |  |  |
|                    |                                                                                                              |                                                                                                                                                                                                                      |  |                    |  |  |  |  |  |  |  |
| 6                  | Payment for expert testimony                                                                                 | <input checked="" type="checkbox"/> None<br><table border="1" data-bbox="383 793 1516 894"> <tr><td></td><td></td></tr> <tr><td></td><td></td></tr> <tr><td></td><td></td></tr> </table>                             |  |                    |  |  |  |  |  |  |  |
|                    |                                                                                                              |                                                                                                                                                                                                                      |  |                    |  |  |  |  |  |  |  |
|                    |                                                                                                              |                                                                                                                                                                                                                      |  |                    |  |  |  |  |  |  |  |
|                    |                                                                                                              |                                                                                                                                                                                                                      |  |                    |  |  |  |  |  |  |  |
| 7                  | Support for attending meetings and/or travel                                                                 | <input checked="" type="checkbox"/> None<br><table border="1" data-bbox="383 1012 1516 1113"> <tr><td></td><td></td></tr> <tr><td></td><td></td></tr> <tr><td></td><td></td></tr> </table>                           |  |                    |  |  |  |  |  |  |  |
|                    |                                                                                                              |                                                                                                                                                                                                                      |  |                    |  |  |  |  |  |  |  |
|                    |                                                                                                              |                                                                                                                                                                                                                      |  |                    |  |  |  |  |  |  |  |
|                    |                                                                                                              |                                                                                                                                                                                                                      |  |                    |  |  |  |  |  |  |  |
| 8                  | Patents planned, issued or pending                                                                           | <input checked="" type="checkbox"/> None<br><table border="1" data-bbox="383 1230 1516 1331"> <tr><td></td><td></td></tr> <tr><td></td><td></td></tr> <tr><td></td><td></td></tr> </table>                           |  |                    |  |  |  |  |  |  |  |
|                    |                                                                                                              |                                                                                                                                                                                                                      |  |                    |  |  |  |  |  |  |  |
|                    |                                                                                                              |                                                                                                                                                                                                                      |  |                    |  |  |  |  |  |  |  |
|                    |                                                                                                              |                                                                                                                                                                                                                      |  |                    |  |  |  |  |  |  |  |
| 9                  | Participation on a Data Safety Monitoring Board or Advisory Board                                            | <input checked="" type="checkbox"/> None<br><table border="1" data-bbox="383 1449 1516 1549"> <tr><td></td><td></td></tr> <tr><td></td><td></td></tr> <tr><td></td><td></td></tr> </table>                           |  |                    |  |  |  |  |  |  |  |
|                    |                                                                                                              |                                                                                                                                                                                                                      |  |                    |  |  |  |  |  |  |  |
|                    |                                                                                                              |                                                                                                                                                                                                                      |  |                    |  |  |  |  |  |  |  |
|                    |                                                                                                              |                                                                                                                                                                                                                      |  |                    |  |  |  |  |  |  |  |
| 10                 | Leadership or fiduciary role in other board, society, committee or advocacy group, paid or unpaid            | <input checked="" type="checkbox"/> None<br><table border="1" data-bbox="383 1633 1516 1734"> <tr><td></td><td></td></tr> <tr><td></td><td></td></tr> <tr><td></td><td></td></tr> </table>                           |  |                    |  |  |  |  |  |  |  |
|                    |                                                                                                              |                                                                                                                                                                                                                      |  |                    |  |  |  |  |  |  |  |
|                    |                                                                                                              |                                                                                                                                                                                                                      |  |                    |  |  |  |  |  |  |  |
|                    |                                                                                                              |                                                                                                                                                                                                                      |  |                    |  |  |  |  |  |  |  |



|           |                                                                                  |                                                                                                                                                                                                 |  |  |  |  |  |  |  |
|-----------|----------------------------------------------------------------------------------|-------------------------------------------------------------------------------------------------------------------------------------------------------------------------------------------------|--|--|--|--|--|--|--|
|           |                                                                                  |                                                                                                                                                                                                 |  |  |  |  |  |  |  |
| <b>11</b> | Stock or stock options                                                           | <input checked="" type="checkbox"/> <b>None</b><br><table border="1" data-bbox="383 228 1516 331"> <tr><td></td><td></td></tr> <tr><td></td><td></td></tr> <tr><td></td><td></td></tr> </table> |  |  |  |  |  |  |  |
|           |                                                                                  |                                                                                                                                                                                                 |  |  |  |  |  |  |  |
|           |                                                                                  |                                                                                                                                                                                                 |  |  |  |  |  |  |  |
|           |                                                                                  |                                                                                                                                                                                                 |  |  |  |  |  |  |  |
| <b>12</b> | Receipt of equipment, materials, drugs, medical writing, gifts or other services | <input type="checkbox"/> <b>None</b><br><table border="1" data-bbox="383 447 1516 550"> <tr><td></td><td></td></tr> <tr><td></td><td></td></tr> <tr><td></td><td></td></tr> </table>            |  |  |  |  |  |  |  |
|           |                                                                                  |                                                                                                                                                                                                 |  |  |  |  |  |  |  |
|           |                                                                                  |                                                                                                                                                                                                 |  |  |  |  |  |  |  |
|           |                                                                                  |                                                                                                                                                                                                 |  |  |  |  |  |  |  |
| <b>13</b> | Other financial or non-financial interests                                       | <input checked="" type="checkbox"/> <b>None</b><br><table border="1" data-bbox="383 661 1516 764"> <tr><td></td><td></td></tr> <tr><td></td><td></td></tr> <tr><td></td><td></td></tr> </table> |  |  |  |  |  |  |  |
|           |                                                                                  |                                                                                                                                                                                                 |  |  |  |  |  |  |  |
|           |                                                                                  |                                                                                                                                                                                                 |  |  |  |  |  |  |  |
|           |                                                                                  |                                                                                                                                                                                                 |  |  |  |  |  |  |  |

**Please place an "X" next to the following statement to indicate your agreement:**

I certify that I have answered every question and have not altered the wording of any of the questions on this form.

## ICMJE DISCLOSURE FORM

**Date:** 1/2/2024

**Your Name:** Shenghu Li

**Manuscript Title:** Diagnosis of lupus mastitis by multimodal ultrasound: A case description.

**Manuscript Number (if known):** QIMS-23-1279

In the interest of transparency, we ask you to disclose all relationships/activities/interests listed below that are related to the content of your manuscript. "Related" means any relation with for-profit or not-for-profit third parties whose interests may be affected by the content of the manuscript. Disclosure represents a commitment to transparency and does not necessarily indicate a bias. If you are in doubt about whether to list a relationship/activity/interest, it is preferable that you do so.

The author's relationships/activities/interests should be defined broadly. For example, if your manuscript pertains to the epidemiology of hypertension, you should declare all relationships with manufacturers of antihypertensive medication, even if that medication is not mentioned in the manuscript.

In item #1 below, report all support for the work reported in this manuscript without time limit. For all other items, the time frame for disclosure is the past 36 months.

| <b>Time frame: Since the initial planning of the work</b> |                                                                                                                                                                                |                                                 |                                                                                                                                                                                                                                                                                                                                                                        |  |  |  |  |  |  |
|-----------------------------------------------------------|--------------------------------------------------------------------------------------------------------------------------------------------------------------------------------|-------------------------------------------------|------------------------------------------------------------------------------------------------------------------------------------------------------------------------------------------------------------------------------------------------------------------------------------------------------------------------------------------------------------------------|--|--|--|--|--|--|
| <b>1</b>                                                  | All support for the present manuscript (e.g., funding, provision of study materials, medical writing, article processing charges, etc.)<br><b>No time limit for this item.</b> | <input checked="" type="checkbox"/> <b>None</b> | <table border="1" style="width: 100%; border-collapse: collapse;"> <tr><td style="height: 20px;"> </td><td style="width: 50%;"> </td></tr> <tr><td style="height: 20px;"> </td><td> </td></tr> <tr><td style="height: 20px;"> </td><td> </td></tr> </table> <p style="font-size: small; text-align: right; color: #ccc;">Click the tab key to add additional rows.</p> |  |  |  |  |  |  |
|                                                           |                                                                                                                                                                                |                                                 |                                                                                                                                                                                                                                                                                                                                                                        |  |  |  |  |  |  |
|                                                           |                                                                                                                                                                                |                                                 |                                                                                                                                                                                                                                                                                                                                                                        |  |  |  |  |  |  |
|                                                           |                                                                                                                                                                                |                                                 |                                                                                                                                                                                                                                                                                                                                                                        |  |  |  |  |  |  |
| <b>Time frame: past 36 months</b>                         |                                                                                                                                                                                |                                                 |                                                                                                                                                                                                                                                                                                                                                                        |  |  |  |  |  |  |
| <b>2</b>                                                  | Grants or contracts from any entity (if not indicated in item #1 above).                                                                                                       | <input checked="" type="checkbox"/> <b>None</b> | <table border="1" style="width: 100%; border-collapse: collapse;"> <tr><td style="height: 20px;"> </td><td style="width: 50%;"> </td></tr> <tr><td style="height: 20px;"> </td><td> </td></tr> <tr><td style="height: 20px;"> </td><td> </td></tr> </table>                                                                                                            |  |  |  |  |  |  |
|                                                           |                                                                                                                                                                                |                                                 |                                                                                                                                                                                                                                                                                                                                                                        |  |  |  |  |  |  |
|                                                           |                                                                                                                                                                                |                                                 |                                                                                                                                                                                                                                                                                                                                                                        |  |  |  |  |  |  |
|                                                           |                                                                                                                                                                                |                                                 |                                                                                                                                                                                                                                                                                                                                                                        |  |  |  |  |  |  |
| <b>3</b>                                                  | Royalties or licenses                                                                                                                                                          | <input checked="" type="checkbox"/> <b>None</b> | <table border="1" style="width: 100%; border-collapse: collapse;"> <tr><td style="height: 20px;"> </td><td style="width: 50%;"> </td></tr> <tr><td style="height: 20px;"> </td><td> </td></tr> <tr><td style="height: 20px;"> </td><td> </td></tr> </table>                                                                                                            |  |  |  |  |  |  |
|                                                           |                                                                                                                                                                                |                                                 |                                                                                                                                                                                                                                                                                                                                                                        |  |  |  |  |  |  |
|                                                           |                                                                                                                                                                                |                                                 |                                                                                                                                                                                                                                                                                                                                                                        |  |  |  |  |  |  |
|                                                           |                                                                                                                                                                                |                                                 |                                                                                                                                                                                                                                                                                                                                                                        |  |  |  |  |  |  |

|                    |                                                                                                              |                                                                                                                                                                    |                    |  |  |  |  |  |
|--------------------|--------------------------------------------------------------------------------------------------------------|--------------------------------------------------------------------------------------------------------------------------------------------------------------------|--------------------|--|--|--|--|--|
|                    |                                                                                                              |                                                                                                                                                                    |                    |  |  |  |  |  |
| <b>4</b>           | Consulting fees                                                                                              | <input checked="" type="checkbox"/> <b>None</b><br><table border="1"> <tr><td></td><td></td></tr> <tr><td></td><td></td></tr> <tr><td></td><td></td></tr> </table> |                    |  |  |  |  |  |
|                    |                                                                                                              |                                                                                                                                                                    |                    |  |  |  |  |  |
|                    |                                                                                                              |                                                                                                                                                                    |                    |  |  |  |  |  |
|                    |                                                                                                              |                                                                                                                                                                    |                    |  |  |  |  |  |
| <b>5</b>           | Payment or honoraria for lectures, presentations, speakers bureaus, manuscript writing or educational events | <input type="checkbox"/> <b>None</b><br><table border="1"> <tr><td>manuscript writing</td><td></td></tr> <tr><td></td><td></td></tr> </table>                      | manuscript writing |  |  |  |  |  |
| manuscript writing |                                                                                                              |                                                                                                                                                                    |                    |  |  |  |  |  |
|                    |                                                                                                              |                                                                                                                                                                    |                    |  |  |  |  |  |
| <b>6</b>           | Payment for expert testimony                                                                                 | <input checked="" type="checkbox"/> <b>None</b><br><table border="1"> <tr><td></td><td></td></tr> <tr><td></td><td></td></tr> </table>                             |                    |  |  |  |  |  |
|                    |                                                                                                              |                                                                                                                                                                    |                    |  |  |  |  |  |
|                    |                                                                                                              |                                                                                                                                                                    |                    |  |  |  |  |  |
| <b>7</b>           | Support for attending meetings and/or travel                                                                 | <input checked="" type="checkbox"/> <b>None</b><br><table border="1"> <tr><td></td><td></td></tr> <tr><td></td><td></td></tr> </table>                             |                    |  |  |  |  |  |
|                    |                                                                                                              |                                                                                                                                                                    |                    |  |  |  |  |  |
|                    |                                                                                                              |                                                                                                                                                                    |                    |  |  |  |  |  |
| <b>8</b>           | Patents planned, issued or pending                                                                           | <input checked="" type="checkbox"/> <b>None</b><br><table border="1"> <tr><td></td><td></td></tr> <tr><td></td><td></td></tr> </table>                             |                    |  |  |  |  |  |
|                    |                                                                                                              |                                                                                                                                                                    |                    |  |  |  |  |  |
|                    |                                                                                                              |                                                                                                                                                                    |                    |  |  |  |  |  |
| <b>9</b>           | Participation on a Data Safety Monitoring Board or Advisory Board                                            | <input checked="" type="checkbox"/> <b>None</b><br><table border="1"> <tr><td></td><td></td></tr> <tr><td></td><td></td></tr> </table>                             |                    |  |  |  |  |  |
|                    |                                                                                                              |                                                                                                                                                                    |                    |  |  |  |  |  |
|                    |                                                                                                              |                                                                                                                                                                    |                    |  |  |  |  |  |
| <b>10</b>          | Leadership or fiduciary role in other board, society, committee or advocacy group, paid or unpaid            | <input checked="" type="checkbox"/> <b>None</b><br><table border="1"> <tr><td></td><td></td></tr> <tr><td></td><td></td></tr> </table>                             |                    |  |  |  |  |  |
|                    |                                                                                                              |                                                                                                                                                                    |                    |  |  |  |  |  |
|                    |                                                                                                              |                                                                                                                                                                    |                    |  |  |  |  |  |

|           |                                                                                  |                                                                                                                                                                                                 |  |  |  |  |  |  |  |
|-----------|----------------------------------------------------------------------------------|-------------------------------------------------------------------------------------------------------------------------------------------------------------------------------------------------|--|--|--|--|--|--|--|
|           |                                                                                  |                                                                                                                                                                                                 |  |  |  |  |  |  |  |
| <b>11</b> | Stock or stock options                                                           | <input checked="" type="checkbox"/> <b>None</b><br><table border="1" data-bbox="383 226 1516 331"> <tr><td></td><td></td></tr> <tr><td></td><td></td></tr> <tr><td></td><td></td></tr> </table> |  |  |  |  |  |  |  |
|           |                                                                                  |                                                                                                                                                                                                 |  |  |  |  |  |  |  |
|           |                                                                                  |                                                                                                                                                                                                 |  |  |  |  |  |  |  |
|           |                                                                                  |                                                                                                                                                                                                 |  |  |  |  |  |  |  |
| <b>12</b> | Receipt of equipment, materials, drugs, medical writing, gifts or other services | <input type="checkbox"/> <b>None</b><br><table border="1" data-bbox="383 447 1516 552"> <tr><td></td><td></td></tr> <tr><td></td><td></td></tr> <tr><td></td><td></td></tr> </table>            |  |  |  |  |  |  |  |
|           |                                                                                  |                                                                                                                                                                                                 |  |  |  |  |  |  |  |
|           |                                                                                  |                                                                                                                                                                                                 |  |  |  |  |  |  |  |
|           |                                                                                  |                                                                                                                                                                                                 |  |  |  |  |  |  |  |
| <b>13</b> | Other financial or non-financial interests                                       | <input checked="" type="checkbox"/> <b>None</b><br><table border="1" data-bbox="383 661 1516 766"> <tr><td></td><td></td></tr> <tr><td></td><td></td></tr> <tr><td></td><td></td></tr> </table> |  |  |  |  |  |  |  |
|           |                                                                                  |                                                                                                                                                                                                 |  |  |  |  |  |  |  |
|           |                                                                                  |                                                                                                                                                                                                 |  |  |  |  |  |  |  |
|           |                                                                                  |                                                                                                                                                                                                 |  |  |  |  |  |  |  |

**Please place an "X" next to the following statement to indicate your agreement:**

I certify that I have answered every question and have not altered the wording of any of the questions on this form.

## ICMJE DISCLOSURE FORM

**Date:** 1/2/2024

**Your Name:** Wenjing Guo

**Manuscript Title:** Diagnosis of lupus mastitis by multimodal ultrasound: A case description.

**Manuscript Number (if known):** QIMS-23-1279

In the interest of transparency, we ask you to disclose all relationships/activities/interests listed below that are related to the content of your manuscript. "Related" means any relation with for-profit or not-for-profit third parties whose interests may be affected by the content of the manuscript. Disclosure represents a commitment to transparency and does not necessarily indicate a bias. If you are in doubt about whether to list a relationship/activity/interest, it is preferable that you do so.

The author's relationships/activities/interests should be defined broadly. For example, if your manuscript pertains to the epidemiology of hypertension, you should declare all relationships with manufacturers of antihypertensive medication, even if that medication is not mentioned in the manuscript.

In item #1 below, report all support for the work reported in this manuscript without time limit. For all other items, the time frame for disclosure is the past 36 months.

| <b>Time frame: Since the initial planning of the work</b> |                                                                                                                                                                                |                                                                                                                                                                                                                                                                                                                                                           |  |  |  |  |  |  |
|-----------------------------------------------------------|--------------------------------------------------------------------------------------------------------------------------------------------------------------------------------|-----------------------------------------------------------------------------------------------------------------------------------------------------------------------------------------------------------------------------------------------------------------------------------------------------------------------------------------------------------|--|--|--|--|--|--|
| <b>1</b>                                                  | All support for the present manuscript (e.g., funding, provision of study materials, medical writing, article processing charges, etc.)<br><b>No time limit for this item.</b> | <input checked="" type="checkbox"/> <b>None</b><br><table border="1" style="width: 100%; height: 40px; margin-top: 5px;"> <tr><td style="width: 60%;"></td><td></td></tr> <tr><td></td><td></td></tr> <tr><td></td><td></td></tr> </table> <p style="font-size: small; text-align: right; margin-top: 5px;">Click the tab key to add additional rows.</p> |  |  |  |  |  |  |
|                                                           |                                                                                                                                                                                |                                                                                                                                                                                                                                                                                                                                                           |  |  |  |  |  |  |
|                                                           |                                                                                                                                                                                |                                                                                                                                                                                                                                                                                                                                                           |  |  |  |  |  |  |
|                                                           |                                                                                                                                                                                |                                                                                                                                                                                                                                                                                                                                                           |  |  |  |  |  |  |
| <b>Time frame: past 36 months</b>                         |                                                                                                                                                                                |                                                                                                                                                                                                                                                                                                                                                           |  |  |  |  |  |  |
| <b>2</b>                                                  | Grants or contracts from any entity (if not indicated in item #1 above).                                                                                                       | <input checked="" type="checkbox"/> <b>None</b><br><table border="1" style="width: 100%; height: 40px; margin-top: 5px;"> <tr><td style="width: 60%;"></td><td></td></tr> <tr><td></td><td></td></tr> <tr><td></td><td></td></tr> </table>                                                                                                                |  |  |  |  |  |  |
|                                                           |                                                                                                                                                                                |                                                                                                                                                                                                                                                                                                                                                           |  |  |  |  |  |  |
|                                                           |                                                                                                                                                                                |                                                                                                                                                                                                                                                                                                                                                           |  |  |  |  |  |  |
|                                                           |                                                                                                                                                                                |                                                                                                                                                                                                                                                                                                                                                           |  |  |  |  |  |  |
| <b>3</b>                                                  | Royalties or licenses                                                                                                                                                          | <input checked="" type="checkbox"/> <b>None</b><br><table border="1" style="width: 100%; height: 40px; margin-top: 5px;"> <tr><td style="width: 60%;"></td><td></td></tr> <tr><td></td><td></td></tr> <tr><td></td><td></td></tr> </table>                                                                                                                |  |  |  |  |  |  |
|                                                           |                                                                                                                                                                                |                                                                                                                                                                                                                                                                                                                                                           |  |  |  |  |  |  |
|                                                           |                                                                                                                                                                                |                                                                                                                                                                                                                                                                                                                                                           |  |  |  |  |  |  |
|                                                           |                                                                                                                                                                                |                                                                                                                                                                                                                                                                                                                                                           |  |  |  |  |  |  |

|                    |                                                                                                              |                                                                                                                                                                           |                    |  |  |  |  |  |
|--------------------|--------------------------------------------------------------------------------------------------------------|---------------------------------------------------------------------------------------------------------------------------------------------------------------------------|--------------------|--|--|--|--|--|
|                    |                                                                                                              |                                                                                                                                                                           |                    |  |  |  |  |  |
| <b>4</b>           | Consulting fees                                                                                              | <input checked="" type="checkbox"/> <b>None</b><br><table border="1"> <tr><td></td><td></td></tr> <tr><td></td><td></td></tr> <tr><td></td><td></td></tr> </table>        |                    |  |  |  |  |  |
|                    |                                                                                                              |                                                                                                                                                                           |                    |  |  |  |  |  |
|                    |                                                                                                              |                                                                                                                                                                           |                    |  |  |  |  |  |
|                    |                                                                                                              |                                                                                                                                                                           |                    |  |  |  |  |  |
| <b>5</b>           | Payment or honoraria for lectures, presentations, speakers bureaus, manuscript writing or educational events | <input type="checkbox"/> <b>None</b><br><table border="1"> <tr><td>manuscript writing</td><td></td></tr> <tr><td></td><td></td></tr> <tr><td></td><td></td></tr> </table> | manuscript writing |  |  |  |  |  |
| manuscript writing |                                                                                                              |                                                                                                                                                                           |                    |  |  |  |  |  |
|                    |                                                                                                              |                                                                                                                                                                           |                    |  |  |  |  |  |
|                    |                                                                                                              |                                                                                                                                                                           |                    |  |  |  |  |  |
| <b>6</b>           | Payment for expert testimony                                                                                 | <input checked="" type="checkbox"/> <b>None</b><br><table border="1"> <tr><td></td><td></td></tr> <tr><td></td><td></td></tr> <tr><td></td><td></td></tr> </table>        |                    |  |  |  |  |  |
|                    |                                                                                                              |                                                                                                                                                                           |                    |  |  |  |  |  |
|                    |                                                                                                              |                                                                                                                                                                           |                    |  |  |  |  |  |
|                    |                                                                                                              |                                                                                                                                                                           |                    |  |  |  |  |  |
| <b>7</b>           | Support for attending meetings and/or travel                                                                 | <input checked="" type="checkbox"/> <b>None</b><br><table border="1"> <tr><td></td><td></td></tr> <tr><td></td><td></td></tr> <tr><td></td><td></td></tr> </table>        |                    |  |  |  |  |  |
|                    |                                                                                                              |                                                                                                                                                                           |                    |  |  |  |  |  |
|                    |                                                                                                              |                                                                                                                                                                           |                    |  |  |  |  |  |
|                    |                                                                                                              |                                                                                                                                                                           |                    |  |  |  |  |  |
| <b>8</b>           | Patents planned, issued or pending                                                                           | <input checked="" type="checkbox"/> <b>None</b><br><table border="1"> <tr><td></td><td></td></tr> <tr><td></td><td></td></tr> <tr><td></td><td></td></tr> </table>        |                    |  |  |  |  |  |
|                    |                                                                                                              |                                                                                                                                                                           |                    |  |  |  |  |  |
|                    |                                                                                                              |                                                                                                                                                                           |                    |  |  |  |  |  |
|                    |                                                                                                              |                                                                                                                                                                           |                    |  |  |  |  |  |
| <b>9</b>           | Participation on a Data Safety Monitoring Board or Advisory Board                                            | <input checked="" type="checkbox"/> <b>None</b><br><table border="1"> <tr><td></td><td></td></tr> <tr><td></td><td></td></tr> <tr><td></td><td></td></tr> </table>        |                    |  |  |  |  |  |
|                    |                                                                                                              |                                                                                                                                                                           |                    |  |  |  |  |  |
|                    |                                                                                                              |                                                                                                                                                                           |                    |  |  |  |  |  |
|                    |                                                                                                              |                                                                                                                                                                           |                    |  |  |  |  |  |
| <b>10</b>          | Leadership or fiduciary role in other board, society, committee or advocacy group, paid or unpaid            | <input checked="" type="checkbox"/> <b>None</b><br><table border="1"> <tr><td></td><td></td></tr> <tr><td></td><td></td></tr> <tr><td></td><td></td></tr> </table>        |                    |  |  |  |  |  |
|                    |                                                                                                              |                                                                                                                                                                           |                    |  |  |  |  |  |
|                    |                                                                                                              |                                                                                                                                                                           |                    |  |  |  |  |  |
|                    |                                                                                                              |                                                                                                                                                                           |                    |  |  |  |  |  |

|           |                                                                                  |                                                                                                                                                                                                 |  |  |  |  |  |  |  |
|-----------|----------------------------------------------------------------------------------|-------------------------------------------------------------------------------------------------------------------------------------------------------------------------------------------------|--|--|--|--|--|--|--|
|           |                                                                                  |                                                                                                                                                                                                 |  |  |  |  |  |  |  |
| <b>11</b> | Stock or stock options                                                           | <input checked="" type="checkbox"/> <b>None</b><br><table border="1" data-bbox="383 228 1516 331"> <tr><td></td><td></td></tr> <tr><td></td><td></td></tr> <tr><td></td><td></td></tr> </table> |  |  |  |  |  |  |  |
|           |                                                                                  |                                                                                                                                                                                                 |  |  |  |  |  |  |  |
|           |                                                                                  |                                                                                                                                                                                                 |  |  |  |  |  |  |  |
|           |                                                                                  |                                                                                                                                                                                                 |  |  |  |  |  |  |  |
| <b>12</b> | Receipt of equipment, materials, drugs, medical writing, gifts or other services | <input type="checkbox"/> <b>None</b><br><table border="1" data-bbox="383 449 1516 552"> <tr><td></td><td></td></tr> <tr><td></td><td></td></tr> <tr><td></td><td></td></tr> </table>            |  |  |  |  |  |  |  |
|           |                                                                                  |                                                                                                                                                                                                 |  |  |  |  |  |  |  |
|           |                                                                                  |                                                                                                                                                                                                 |  |  |  |  |  |  |  |
|           |                                                                                  |                                                                                                                                                                                                 |  |  |  |  |  |  |  |
| <b>13</b> | Other financial or non-financial interests                                       | <input checked="" type="checkbox"/> <b>None</b><br><table border="1" data-bbox="383 663 1516 766"> <tr><td></td><td></td></tr> <tr><td></td><td></td></tr> <tr><td></td><td></td></tr> </table> |  |  |  |  |  |  |  |
|           |                                                                                  |                                                                                                                                                                                                 |  |  |  |  |  |  |  |
|           |                                                                                  |                                                                                                                                                                                                 |  |  |  |  |  |  |  |
|           |                                                                                  |                                                                                                                                                                                                 |  |  |  |  |  |  |  |

**Please place an "X" next to the following statement to indicate your agreement:**

I certify that I have answered every question and have not altered the wording of any of the questions on this form.

## ICMJE DISCLOSURE FORM

**Date:** 1/2/2024

**Your Name:** Jiawei Song

**Manuscript Title:** Diagnosis of lupus mastitis by multimodal ultrasound: A case description.

**Manuscript Number (if known):** QIMS-23-1279

In the interest of transparency, we ask you to disclose all relationships/activities/interests listed below that are related to the content of your manuscript. "Related" means any relation with for-profit or not-for-profit third parties whose interests may be affected by the content of the manuscript. Disclosure represents a commitment to transparency and does not necessarily indicate a bias. If you are in doubt about whether to list a relationship/activity/interest, it is preferable that you do so.

The author's relationships/activities/interests should be defined broadly. For example, if your manuscript pertains to the epidemiology of hypertension, you should declare all relationships with manufacturers of antihypertensive medication, even if that medication is not mentioned in the manuscript.

In item #1 below, report all support for the work reported in this manuscript without time limit. For all other items, the time frame for disclosure is the past 36 months.

| <b>Time frame: Since the initial planning of the work</b> |                                                                                                                                                                                |                                                                                                                                                                                                                                                                                                                                                           |  |  |  |  |  |  |
|-----------------------------------------------------------|--------------------------------------------------------------------------------------------------------------------------------------------------------------------------------|-----------------------------------------------------------------------------------------------------------------------------------------------------------------------------------------------------------------------------------------------------------------------------------------------------------------------------------------------------------|--|--|--|--|--|--|
| <b>1</b>                                                  | All support for the present manuscript (e.g., funding, provision of study materials, medical writing, article processing charges, etc.)<br><b>No time limit for this item.</b> | <input checked="" type="checkbox"/> <b>None</b><br><table border="1" style="width: 100%; height: 40px; margin-top: 5px;"> <tr><td style="width: 60%;"></td><td></td></tr> <tr><td></td><td></td></tr> <tr><td></td><td></td></tr> </table> <p style="font-size: small; text-align: right; margin-top: 5px;">Click the tab key to add additional rows.</p> |  |  |  |  |  |  |
|                                                           |                                                                                                                                                                                |                                                                                                                                                                                                                                                                                                                                                           |  |  |  |  |  |  |
|                                                           |                                                                                                                                                                                |                                                                                                                                                                                                                                                                                                                                                           |  |  |  |  |  |  |
|                                                           |                                                                                                                                                                                |                                                                                                                                                                                                                                                                                                                                                           |  |  |  |  |  |  |
| <b>Time frame: past 36 months</b>                         |                                                                                                                                                                                |                                                                                                                                                                                                                                                                                                                                                           |  |  |  |  |  |  |
| <b>2</b>                                                  | Grants or contracts from any entity (if not indicated in item #1 above).                                                                                                       | <input checked="" type="checkbox"/> <b>None</b><br><table border="1" style="width: 100%; height: 40px; margin-top: 5px;"> <tr><td style="width: 60%;"></td><td></td></tr> <tr><td></td><td></td></tr> <tr><td></td><td></td></tr> </table>                                                                                                                |  |  |  |  |  |  |
|                                                           |                                                                                                                                                                                |                                                                                                                                                                                                                                                                                                                                                           |  |  |  |  |  |  |
|                                                           |                                                                                                                                                                                |                                                                                                                                                                                                                                                                                                                                                           |  |  |  |  |  |  |
|                                                           |                                                                                                                                                                                |                                                                                                                                                                                                                                                                                                                                                           |  |  |  |  |  |  |
| <b>3</b>                                                  | Royalties or licenses                                                                                                                                                          | <input checked="" type="checkbox"/> <b>None</b><br><table border="1" style="width: 100%; height: 40px; margin-top: 5px;"> <tr><td style="width: 60%;"></td><td></td></tr> <tr><td></td><td></td></tr> <tr><td></td><td></td></tr> </table>                                                                                                                |  |  |  |  |  |  |
|                                                           |                                                                                                                                                                                |                                                                                                                                                                                                                                                                                                                                                           |  |  |  |  |  |  |
|                                                           |                                                                                                                                                                                |                                                                                                                                                                                                                                                                                                                                                           |  |  |  |  |  |  |
|                                                           |                                                                                                                                                                                |                                                                                                                                                                                                                                                                                                                                                           |  |  |  |  |  |  |



|                    |                                                                                                              |                                                                                                                                                                                                                      |  |                    |  |  |  |  |  |  |  |
|--------------------|--------------------------------------------------------------------------------------------------------------|----------------------------------------------------------------------------------------------------------------------------------------------------------------------------------------------------------------------|--|--------------------|--|--|--|--|--|--|--|
|                    |                                                                                                              |                                                                                                                                                                                                                      |  |                    |  |  |  |  |  |  |  |
| 4                  | Consulting fees                                                                                              | <input checked="" type="checkbox"/> None<br><table border="1" data-bbox="386 226 1515 363"> <tr><td></td><td></td></tr> <tr><td></td><td></td></tr> <tr><td></td><td></td></tr> <tr><td></td><td></td></tr> </table> |  |                    |  |  |  |  |  |  |  |
|                    |                                                                                                              |                                                                                                                                                                                                                      |  |                    |  |  |  |  |  |  |  |
|                    |                                                                                                              |                                                                                                                                                                                                                      |  |                    |  |  |  |  |  |  |  |
|                    |                                                                                                              |                                                                                                                                                                                                                      |  |                    |  |  |  |  |  |  |  |
|                    |                                                                                                              |                                                                                                                                                                                                                      |  |                    |  |  |  |  |  |  |  |
| 5                  | Payment or honoraria for lectures, presentations, speakers bureaus, manuscript writing or educational events | <input type="checkbox"/> None<br><table border="1" data-bbox="386 451 1515 552"> <tr><td>manuscript writing</td><td></td></tr> <tr><td></td><td></td></tr> <tr><td></td><td></td></tr> </table>                      |  | manuscript writing |  |  |  |  |  |  |  |
| manuscript writing |                                                                                                              |                                                                                                                                                                                                                      |  |                    |  |  |  |  |  |  |  |
|                    |                                                                                                              |                                                                                                                                                                                                                      |  |                    |  |  |  |  |  |  |  |
|                    |                                                                                                              |                                                                                                                                                                                                                      |  |                    |  |  |  |  |  |  |  |
| 6                  | Payment for expert testimony                                                                                 | <input checked="" type="checkbox"/> None<br><table border="1" data-bbox="386 793 1515 894"> <tr><td></td><td></td></tr> <tr><td></td><td></td></tr> <tr><td></td><td></td></tr> </table>                             |  |                    |  |  |  |  |  |  |  |
|                    |                                                                                                              |                                                                                                                                                                                                                      |  |                    |  |  |  |  |  |  |  |
|                    |                                                                                                              |                                                                                                                                                                                                                      |  |                    |  |  |  |  |  |  |  |
|                    |                                                                                                              |                                                                                                                                                                                                                      |  |                    |  |  |  |  |  |  |  |
| 7                  | Support for attending meetings and/or travel                                                                 | <input checked="" type="checkbox"/> None<br><table border="1" data-bbox="386 1012 1515 1113"> <tr><td></td><td></td></tr> <tr><td></td><td></td></tr> <tr><td></td><td></td></tr> </table>                           |  |                    |  |  |  |  |  |  |  |
|                    |                                                                                                              |                                                                                                                                                                                                                      |  |                    |  |  |  |  |  |  |  |
|                    |                                                                                                              |                                                                                                                                                                                                                      |  |                    |  |  |  |  |  |  |  |
|                    |                                                                                                              |                                                                                                                                                                                                                      |  |                    |  |  |  |  |  |  |  |
| 8                  | Patents planned, issued or pending                                                                           | <input checked="" type="checkbox"/> None<br><table border="1" data-bbox="386 1230 1515 1331"> <tr><td></td><td></td></tr> <tr><td></td><td></td></tr> <tr><td></td><td></td></tr> </table>                           |  |                    |  |  |  |  |  |  |  |
|                    |                                                                                                              |                                                                                                                                                                                                                      |  |                    |  |  |  |  |  |  |  |
|                    |                                                                                                              |                                                                                                                                                                                                                      |  |                    |  |  |  |  |  |  |  |
|                    |                                                                                                              |                                                                                                                                                                                                                      |  |                    |  |  |  |  |  |  |  |
| 9                  | Participation on a Data Safety Monitoring Board or Advisory Board                                            | <input checked="" type="checkbox"/> None<br><table border="1" data-bbox="386 1446 1515 1547"> <tr><td></td><td></td></tr> <tr><td></td><td></td></tr> <tr><td></td><td></td></tr> </table>                           |  |                    |  |  |  |  |  |  |  |
|                    |                                                                                                              |                                                                                                                                                                                                                      |  |                    |  |  |  |  |  |  |  |
|                    |                                                                                                              |                                                                                                                                                                                                                      |  |                    |  |  |  |  |  |  |  |
|                    |                                                                                                              |                                                                                                                                                                                                                      |  |                    |  |  |  |  |  |  |  |
| 10                 | Leadership or fiduciary role in other board, society, committee or advocacy group, paid or unpaid            | <input checked="" type="checkbox"/> None<br><table border="1" data-bbox="386 1633 1515 1734"> <tr><td></td><td></td></tr> <tr><td></td><td></td></tr> <tr><td></td><td></td></tr> </table>                           |  |                    |  |  |  |  |  |  |  |
|                    |                                                                                                              |                                                                                                                                                                                                                      |  |                    |  |  |  |  |  |  |  |
|                    |                                                                                                              |                                                                                                                                                                                                                      |  |                    |  |  |  |  |  |  |  |
|                    |                                                                                                              |                                                                                                                                                                                                                      |  |                    |  |  |  |  |  |  |  |

|           |                                                                                  |                                                                                                                                                                                                 |  |  |  |  |  |  |  |
|-----------|----------------------------------------------------------------------------------|-------------------------------------------------------------------------------------------------------------------------------------------------------------------------------------------------|--|--|--|--|--|--|--|
|           |                                                                                  |                                                                                                                                                                                                 |  |  |  |  |  |  |  |
| <b>11</b> | Stock or stock options                                                           | <input checked="" type="checkbox"/> <b>None</b><br><table border="1" data-bbox="383 228 1516 331"> <tr><td></td><td></td></tr> <tr><td></td><td></td></tr> <tr><td></td><td></td></tr> </table> |  |  |  |  |  |  |  |
|           |                                                                                  |                                                                                                                                                                                                 |  |  |  |  |  |  |  |
|           |                                                                                  |                                                                                                                                                                                                 |  |  |  |  |  |  |  |
|           |                                                                                  |                                                                                                                                                                                                 |  |  |  |  |  |  |  |
| <b>12</b> | Receipt of equipment, materials, drugs, medical writing, gifts or other services | <input type="checkbox"/> <b>None</b><br><table border="1" data-bbox="383 449 1516 552"> <tr><td></td><td></td></tr> <tr><td></td><td></td></tr> <tr><td></td><td></td></tr> </table>            |  |  |  |  |  |  |  |
|           |                                                                                  |                                                                                                                                                                                                 |  |  |  |  |  |  |  |
|           |                                                                                  |                                                                                                                                                                                                 |  |  |  |  |  |  |  |
|           |                                                                                  |                                                                                                                                                                                                 |  |  |  |  |  |  |  |
| <b>13</b> | Other financial or non-financial interests                                       | <input checked="" type="checkbox"/> <b>None</b><br><table border="1" data-bbox="383 663 1516 766"> <tr><td></td><td></td></tr> <tr><td></td><td></td></tr> <tr><td></td><td></td></tr> </table> |  |  |  |  |  |  |  |
|           |                                                                                  |                                                                                                                                                                                                 |  |  |  |  |  |  |  |
|           |                                                                                  |                                                                                                                                                                                                 |  |  |  |  |  |  |  |
|           |                                                                                  |                                                                                                                                                                                                 |  |  |  |  |  |  |  |

**Please place an "X" next to the following statement to indicate your agreement:**

I certify that I have answered every question and have not altered the wording of any of the questions on this form.

# ICMJE DISCLOSURE FORM

**Date:** 1/2/2024

**Your Name:** Zhiheng Yan

**Manuscript Title:** Diagnosis of lupus mastitis by multimodal ultrasound: A case description.

**Manuscript Number (if known):** QIMS-23-1279

In the interest of transparency, we ask you to disclose all relationships/activities/interests listed below that are related to the content of your manuscript. "Related" means any relation with for-profit or not-for-profit third parties whose interests may be affected by the content of the manuscript. Disclosure represents a commitment to transparency and does not necessarily indicate a bias. If you are in doubt about whether to list a relationship/activity/interest, it is preferable that you do so.

The author's relationships/activities/interests should be defined broadly. For example, if your manuscript pertains to the epidemiology of hypertension, you should declare all relationships with manufacturers of antihypertensive medication, even if that medication is not mentioned in the manuscript.

In item #1 below, report all support for the work reported in this manuscript without time limit. For all other items, the time frame for disclosure is the past 36 months.

| <b>Time frame: Since the initial planning of the work</b> |                                                                                                                                                                                |                                                                                                                                                                                                                                                                                                                                                       |  |  |  |  |  |  |
|-----------------------------------------------------------|--------------------------------------------------------------------------------------------------------------------------------------------------------------------------------|-------------------------------------------------------------------------------------------------------------------------------------------------------------------------------------------------------------------------------------------------------------------------------------------------------------------------------------------------------|--|--|--|--|--|--|
| <b>1</b>                                                  | All support for the present manuscript (e.g., funding, provision of study materials, medical writing, article processing charges, etc.)<br><b>No time limit for this item.</b> | <input checked="" type="checkbox"/> <b>None</b><br><table border="1" style="width: 100%; height: 40px; margin-top: 5px;"> <tr><td style="width: 60%;"></td><td></td></tr> <tr><td></td><td></td></tr> <tr><td></td><td></td></tr> </table> <p style="font-size: small; color: gray; text-align: right;">Click the tab key to add additional rows.</p> |  |  |  |  |  |  |
|                                                           |                                                                                                                                                                                |                                                                                                                                                                                                                                                                                                                                                       |  |  |  |  |  |  |
|                                                           |                                                                                                                                                                                |                                                                                                                                                                                                                                                                                                                                                       |  |  |  |  |  |  |
|                                                           |                                                                                                                                                                                |                                                                                                                                                                                                                                                                                                                                                       |  |  |  |  |  |  |
| <b>Time frame: past 36 months</b>                         |                                                                                                                                                                                |                                                                                                                                                                                                                                                                                                                                                       |  |  |  |  |  |  |
| <b>2</b>                                                  | Grants or contracts from any entity (if not indicated in item #1 above).                                                                                                       | <input checked="" type="checkbox"/> <b>None</b><br><table border="1" style="width: 100%; height: 40px; margin-top: 5px;"> <tr><td style="width: 60%;"></td><td></td></tr> <tr><td></td><td></td></tr> <tr><td></td><td></td></tr> </table>                                                                                                            |  |  |  |  |  |  |
|                                                           |                                                                                                                                                                                |                                                                                                                                                                                                                                                                                                                                                       |  |  |  |  |  |  |
|                                                           |                                                                                                                                                                                |                                                                                                                                                                                                                                                                                                                                                       |  |  |  |  |  |  |
|                                                           |                                                                                                                                                                                |                                                                                                                                                                                                                                                                                                                                                       |  |  |  |  |  |  |
| <b>3</b>                                                  | Royalties or licenses                                                                                                                                                          | <input checked="" type="checkbox"/> <b>None</b><br><table border="1" style="width: 100%; height: 40px; margin-top: 5px;"> <tr><td style="width: 60%;"></td><td></td></tr> <tr><td></td><td></td></tr> <tr><td></td><td></td></tr> </table>                                                                                                            |  |  |  |  |  |  |
|                                                           |                                                                                                                                                                                |                                                                                                                                                                                                                                                                                                                                                       |  |  |  |  |  |  |
|                                                           |                                                                                                                                                                                |                                                                                                                                                                                                                                                                                                                                                       |  |  |  |  |  |  |
|                                                           |                                                                                                                                                                                |                                                                                                                                                                                                                                                                                                                                                       |  |  |  |  |  |  |

|                    |                                                                                                              |                                                                                                                                                                    |                    |  |  |  |  |  |
|--------------------|--------------------------------------------------------------------------------------------------------------|--------------------------------------------------------------------------------------------------------------------------------------------------------------------|--------------------|--|--|--|--|--|
|                    |                                                                                                              |                                                                                                                                                                    |                    |  |  |  |  |  |
| <b>4</b>           | Consulting fees                                                                                              | <input checked="" type="checkbox"/> <b>None</b><br><table border="1"> <tr><td></td><td></td></tr> <tr><td></td><td></td></tr> <tr><td></td><td></td></tr> </table> |                    |  |  |  |  |  |
|                    |                                                                                                              |                                                                                                                                                                    |                    |  |  |  |  |  |
|                    |                                                                                                              |                                                                                                                                                                    |                    |  |  |  |  |  |
|                    |                                                                                                              |                                                                                                                                                                    |                    |  |  |  |  |  |
| <b>5</b>           | Payment or honoraria for lectures, presentations, speakers bureaus, manuscript writing or educational events | <input type="checkbox"/> <b>None</b><br><table border="1"> <tr><td>manuscript writing</td><td></td></tr> <tr><td></td><td></td></tr> </table>                      | manuscript writing |  |  |  |  |  |
| manuscript writing |                                                                                                              |                                                                                                                                                                    |                    |  |  |  |  |  |
|                    |                                                                                                              |                                                                                                                                                                    |                    |  |  |  |  |  |
| <b>6</b>           | Payment for expert testimony                                                                                 | <input checked="" type="checkbox"/> <b>None</b><br><table border="1"> <tr><td></td><td></td></tr> <tr><td></td><td></td></tr> </table>                             |                    |  |  |  |  |  |
|                    |                                                                                                              |                                                                                                                                                                    |                    |  |  |  |  |  |
|                    |                                                                                                              |                                                                                                                                                                    |                    |  |  |  |  |  |
| <b>7</b>           | Support for attending meetings and/or travel                                                                 | <input checked="" type="checkbox"/> <b>None</b><br><table border="1"> <tr><td></td><td></td></tr> <tr><td></td><td></td></tr> </table>                             |                    |  |  |  |  |  |
|                    |                                                                                                              |                                                                                                                                                                    |                    |  |  |  |  |  |
|                    |                                                                                                              |                                                                                                                                                                    |                    |  |  |  |  |  |
| <b>8</b>           | Patents planned, issued or pending                                                                           | <input checked="" type="checkbox"/> <b>None</b><br><table border="1"> <tr><td></td><td></td></tr> <tr><td></td><td></td></tr> </table>                             |                    |  |  |  |  |  |
|                    |                                                                                                              |                                                                                                                                                                    |                    |  |  |  |  |  |
|                    |                                                                                                              |                                                                                                                                                                    |                    |  |  |  |  |  |
| <b>9</b>           | Participation on a Data Safety Monitoring Board or Advisory Board                                            | <input checked="" type="checkbox"/> <b>None</b><br><table border="1"> <tr><td></td><td></td></tr> <tr><td></td><td></td></tr> </table>                             |                    |  |  |  |  |  |
|                    |                                                                                                              |                                                                                                                                                                    |                    |  |  |  |  |  |
|                    |                                                                                                              |                                                                                                                                                                    |                    |  |  |  |  |  |
| <b>10</b>          | Leadership or fiduciary role in other board, society, committee or advocacy group, paid or unpaid            | <input checked="" type="checkbox"/> <b>None</b><br><table border="1"> <tr><td></td><td></td></tr> <tr><td></td><td></td></tr> </table>                             |                    |  |  |  |  |  |
|                    |                                                                                                              |                                                                                                                                                                    |                    |  |  |  |  |  |
|                    |                                                                                                              |                                                                                                                                                                    |                    |  |  |  |  |  |

|           |                                                                                  |                                                                                                                                                                                                 |  |  |  |  |  |  |  |
|-----------|----------------------------------------------------------------------------------|-------------------------------------------------------------------------------------------------------------------------------------------------------------------------------------------------|--|--|--|--|--|--|--|
|           |                                                                                  |                                                                                                                                                                                                 |  |  |  |  |  |  |  |
| <b>11</b> | Stock or stock options                                                           | <input checked="" type="checkbox"/> <b>None</b><br><table border="1" data-bbox="383 228 1516 331"> <tr><td></td><td></td></tr> <tr><td></td><td></td></tr> <tr><td></td><td></td></tr> </table> |  |  |  |  |  |  |  |
|           |                                                                                  |                                                                                                                                                                                                 |  |  |  |  |  |  |  |
|           |                                                                                  |                                                                                                                                                                                                 |  |  |  |  |  |  |  |
|           |                                                                                  |                                                                                                                                                                                                 |  |  |  |  |  |  |  |
| <b>12</b> | Receipt of equipment, materials, drugs, medical writing, gifts or other services | <input type="checkbox"/> <b>None</b><br><table border="1" data-bbox="383 449 1516 552"> <tr><td></td><td></td></tr> <tr><td></td><td></td></tr> <tr><td></td><td></td></tr> </table>            |  |  |  |  |  |  |  |
|           |                                                                                  |                                                                                                                                                                                                 |  |  |  |  |  |  |  |
|           |                                                                                  |                                                                                                                                                                                                 |  |  |  |  |  |  |  |
|           |                                                                                  |                                                                                                                                                                                                 |  |  |  |  |  |  |  |
| <b>13</b> | Other financial or non-financial interests                                       | <input checked="" type="checkbox"/> <b>None</b><br><table border="1" data-bbox="383 663 1516 766"> <tr><td></td><td></td></tr> <tr><td></td><td></td></tr> <tr><td></td><td></td></tr> </table> |  |  |  |  |  |  |  |
|           |                                                                                  |                                                                                                                                                                                                 |  |  |  |  |  |  |  |
|           |                                                                                  |                                                                                                                                                                                                 |  |  |  |  |  |  |  |
|           |                                                                                  |                                                                                                                                                                                                 |  |  |  |  |  |  |  |

**Please place an "X" next to the following statement to indicate your agreement:**

I certify that I have answered every question and have not altered the wording of any of the questions on this form.
